# Supplementary material for: Upregulation of the AcrAB2NodT efflux pump confers antibiotic resistance at the cost of collateral metal sensitivity
Source: Research Square preprint supplement (doi:10.21203/rs.3.rs-7211906/v1), 2025-08-12
Supplement: Supplementary file 1 [file 9d4d2101edfbc2aa734d375b.pdf]

**Figure S1**

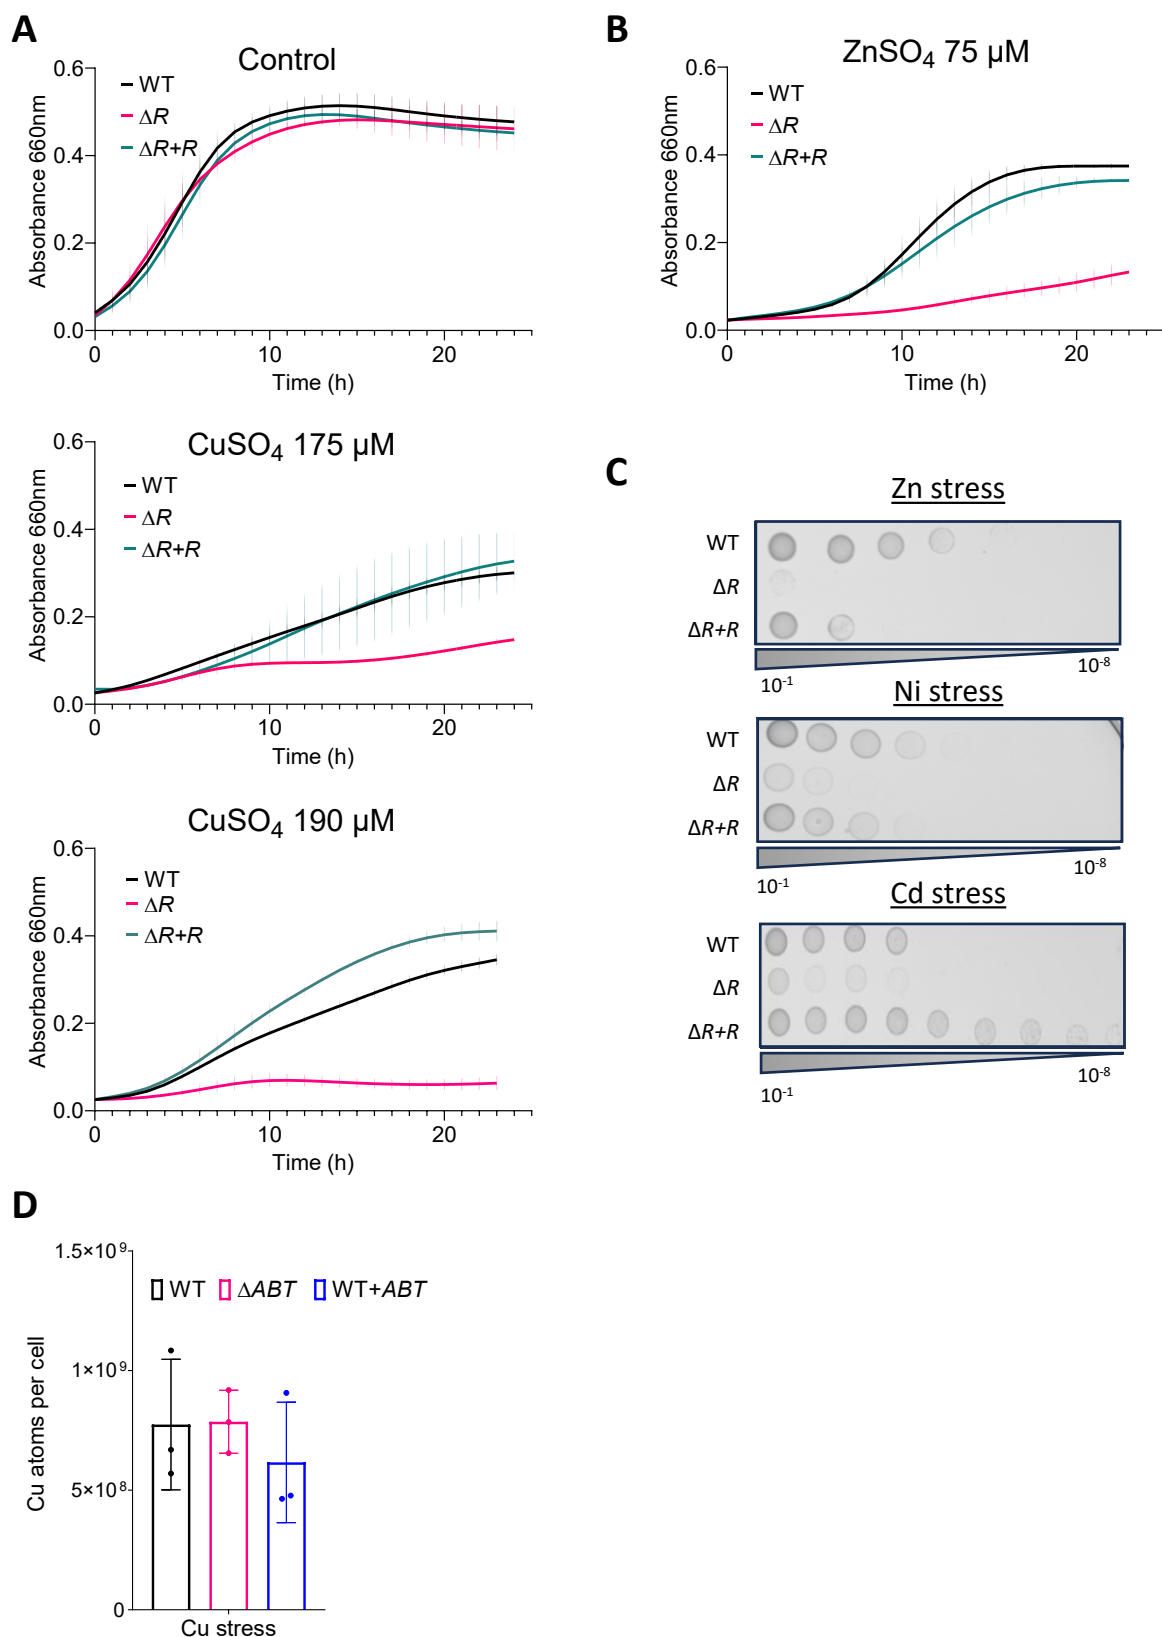

**Figure S1: Cu sensitivity of the  $\Delta R$  mutant is not Cu-specific.** **A.** Growth profiles at an  $\text{OD}_{660 \text{ nm}}$  of WT,  $\Delta R$ , and  $\Delta R+R$  strains in control PYE medium and supplemented with 175  $\mu\text{M}$  and 190  $\mu\text{M}$   $\text{CuSO}_4$ . **B.** Growth profiles at an  $\text{OD}_{660 \text{ nm}}$  of WT,  $\Delta R$ , and  $\Delta R+R$  strains in control PYE medium supplemented with 75  $\mu\text{M}$  of  $\text{ZnSO}_4$ . **C.** Viability assay on PYE plates of WT,  $\Delta R$ , and  $\Delta R+R$  strains, in 50  $\mu\text{M}$   $\text{ZnSO}_4$ , 200  $\mu\text{M}$   $\text{NiSO}_4$  and 2  $\mu\text{M}$   $\text{CdSO}_4$  conditions. **D.** Number of Cu atoms per cell exposed to 175  $\mu\text{M}$   $\text{CuSO}_4$  excess for 5 min. All data are represented as the mean  $\pm$  SD, with at least three biological replicates.

**Figure S2**

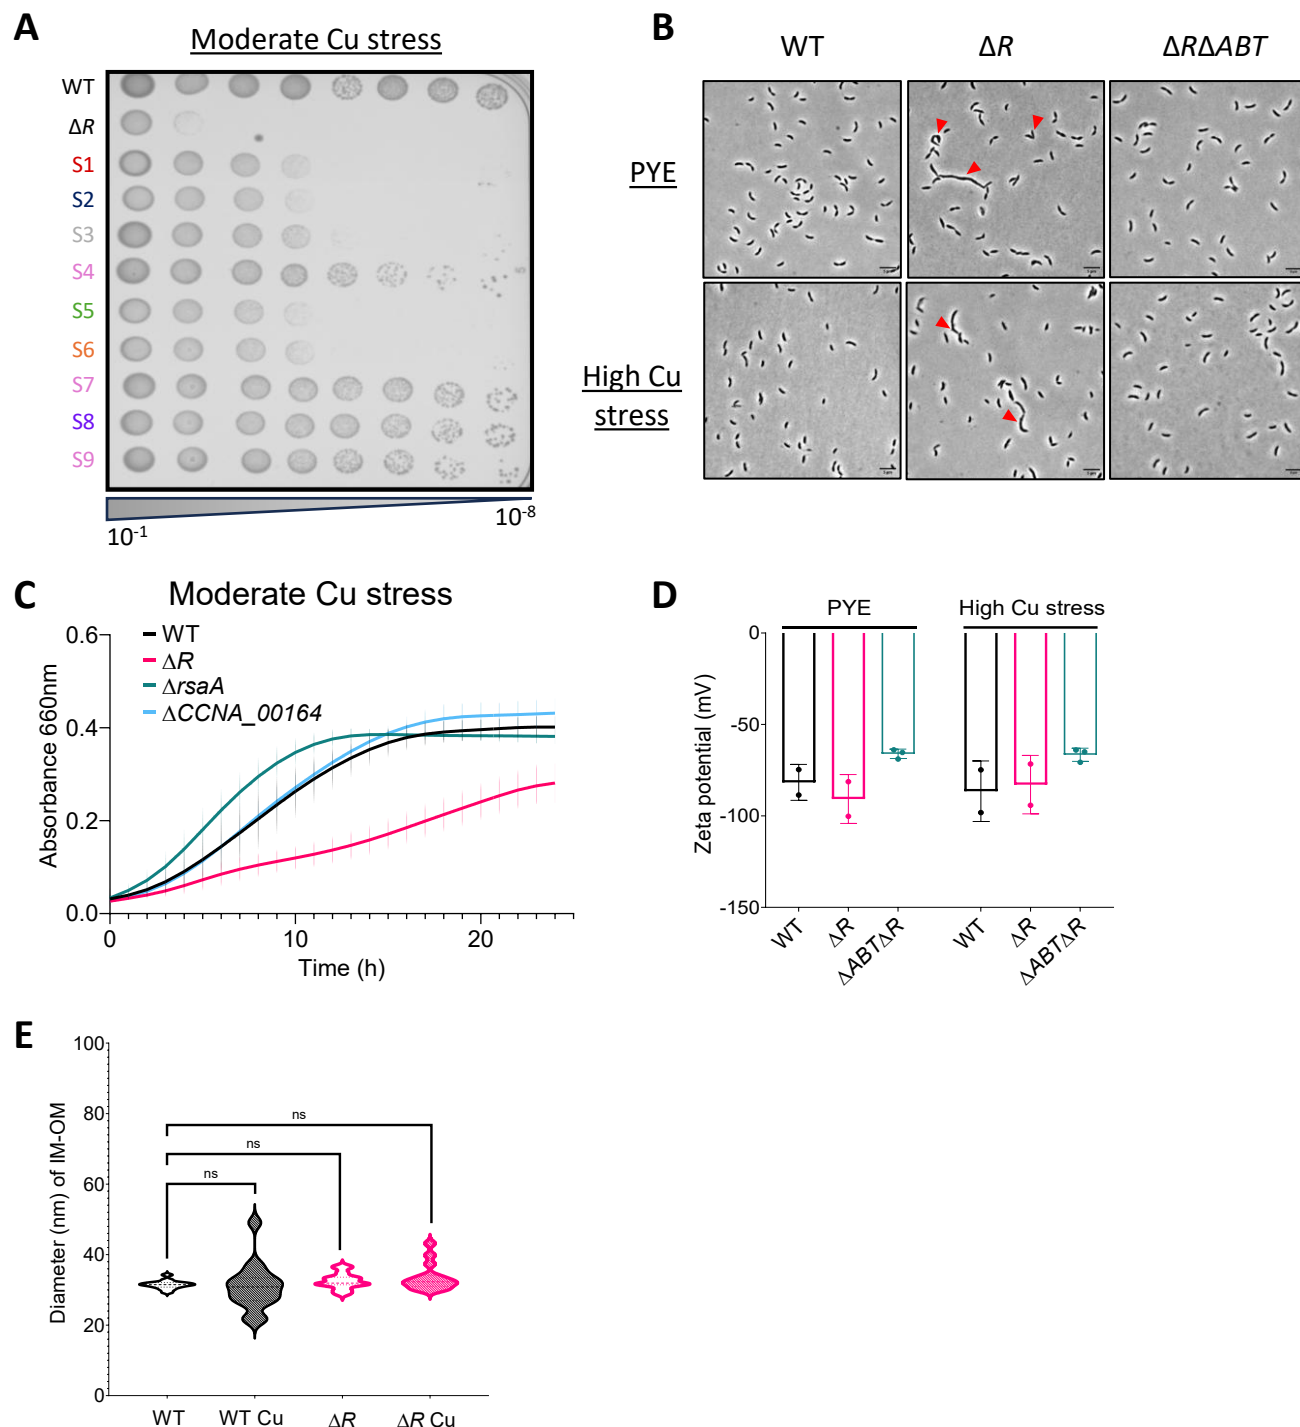

**Figure S2: Microscopic and genetic analysis of cell surface alterations and their Impact on Cu sensitivity.** **A.** Suppressors of the  $\Delta R$  mutant were found on PYE plates supplemented with 120  $\mu\text{M}$   $\text{CuSO}_4$ . In total, 9 suppressors were isolated, which to some extent showed improved growth on Cu compared to the  $\Delta R$  mutant. **B.** Phase-contrast microscopy images of WT,  $\Delta R$ , and  $\Delta R\Delta ABT$  strains at exponential phase in control condition and exposed for 1 h to 190  $\mu\text{M}$   $\text{CuSO}_4$  (bar = 5  $\mu\text{m}$ ). **C.** Growth profiles at an  $\text{OD}_{660}$  nm of WT,  $\Delta R$ ,  $\Delta\text{rsaA}$ , and  $\Delta\text{CCNA\_00164}$  strains PYE medium supplemented with 150  $\mu\text{M}$   $\text{CuSO}_4$ . All data are represented as the mean  $\pm$  SD, with at least three biological replicates. **D.** Zeta potential measurements of WT,  $\Delta R$ , and  $\Delta R\Delta ABT$  cells with or without 190  $\mu\text{M}$   $\text{CuSO}_4$  treatment. Mean  $\pm$  SD, at least two biological replicates. **E.** Diameter of the distance between OM-IM space from Cryo-EM images. Distribution of OM-IM diameter space quantified from Cryo-EM microscopy images of WT and  $\Delta R$  strains at exponential phase in control condition and exposed for 1 h to 190  $\mu\text{M}$   $\text{CuSO}_4$ . The solid line indicates the median, broken lines represent the 25<sup>th</sup> and 75<sup>th</sup> percentiles, respectively.

Figure S3

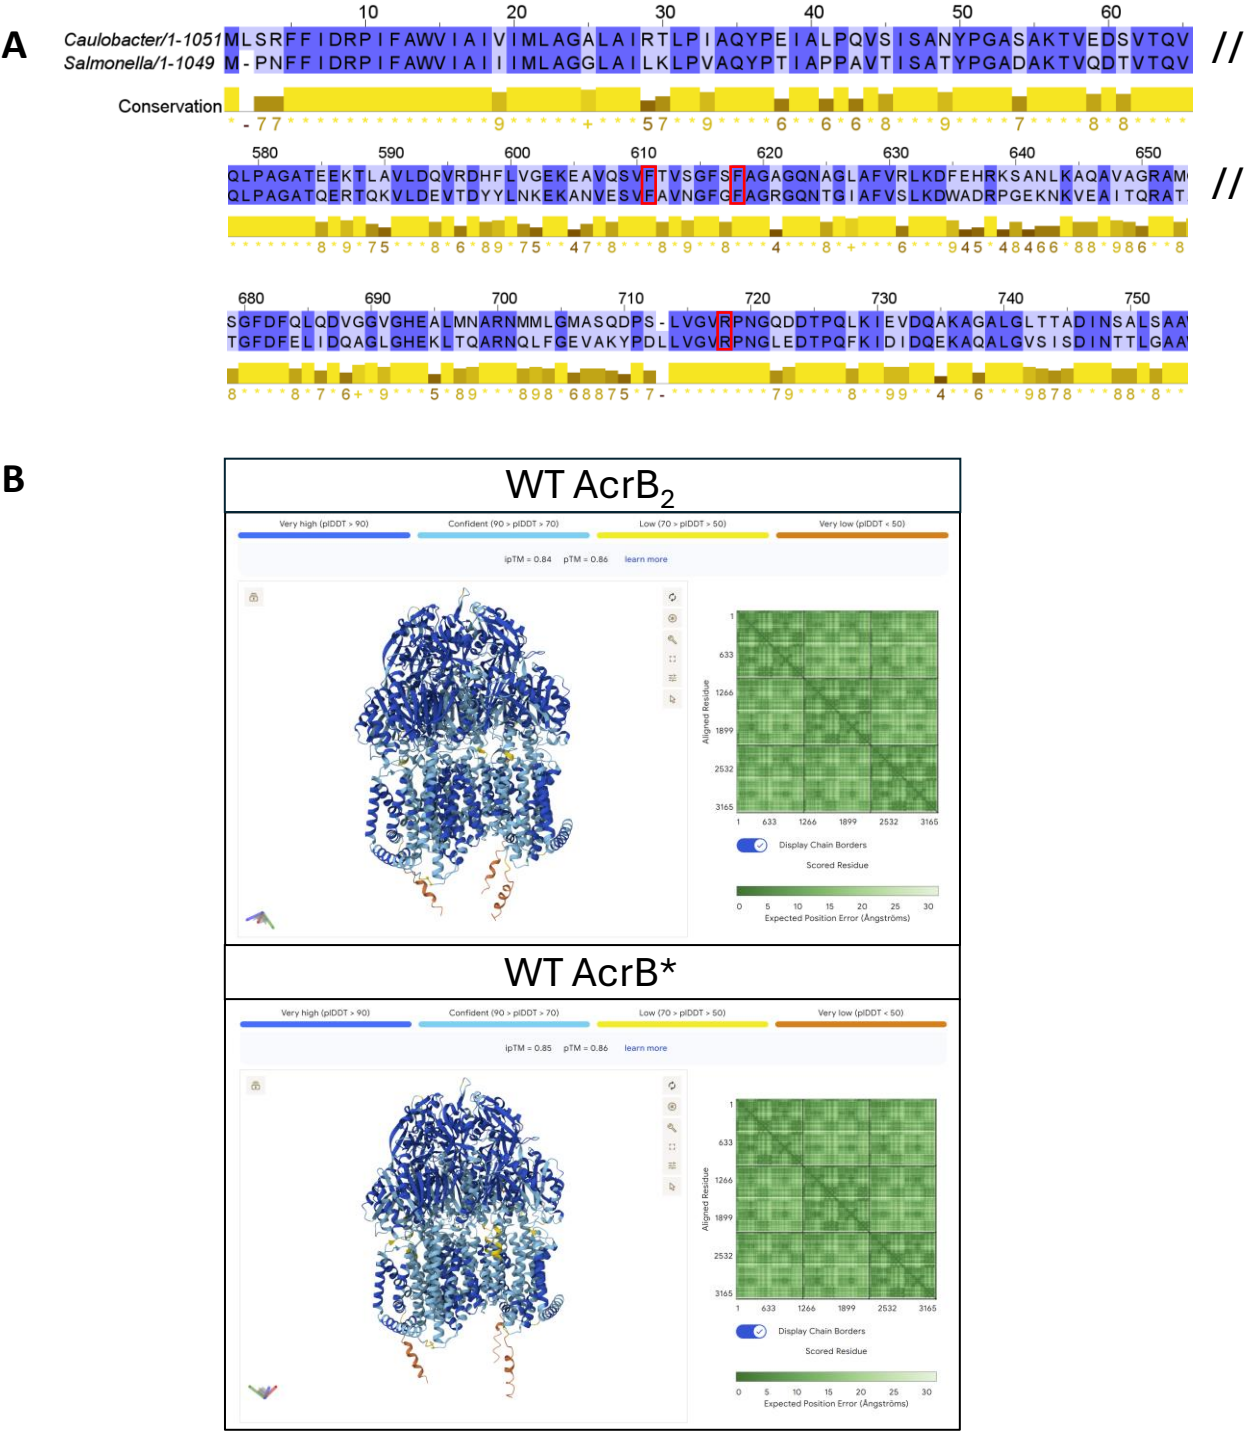

**Figure S3: Multiple sequence alignment of AcrB<sub>2</sub> and AlphaFold3 prediction. A.** Multiple MAFFT alignment of AcrB<sub>cv</sub> with AcrB homologs from *Salmonella typhimurium*. Identical residues are highlighted in blue, and the three conserved amino acids of interest, F610, F617, and R716, are highlighted in red. **B.** Graphic plot of the prediction of AcrB<sub>cv</sub> and AcrB<sub>cv</sub>\* accounting for the pLDDT and PAE (source AlphaFold3).

## Figure S4

A

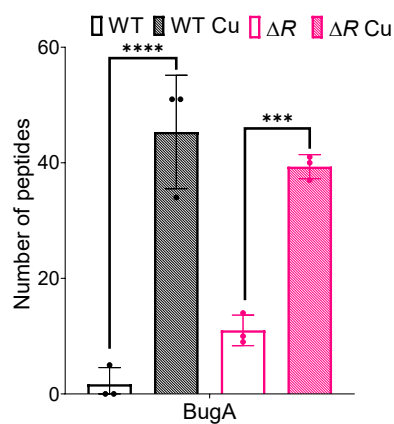

**Figure S4: Protein abundance of BugA. A.** Normalized total spectrum count of BugA protein in PYE medium, in combination with a 1 h exposure to 190  $\mu$ M CuSO<sub>4</sub>. All data are represented as the mean  $\pm$  SD, with at least three biological replicates.  $p$  values were calculated using ANOVA combined with Tukey's multiple comparison test (\*\*\*\* $p$  < 0.0001, \*\*\* $p$  < 0.001, \*\* $p$  < 0.01, \* $p$  < 0.05).

**Figure S5**

**A**

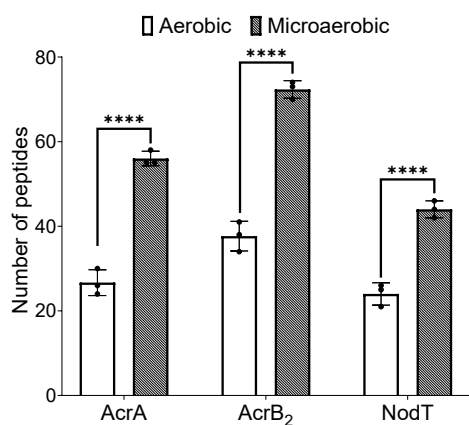

**Figure S5: Metabolism switch upon AcrAB<sub>2</sub>NodT expression. A.** Normalized total spectrum count of AcrAB<sub>2</sub>NodT protein in PYE medium, in aerobic and microaerobic conditions. All data are represented as the mean  $\pm$  SD, with at least three biological replicates.  $p$  values were calculated using ANOVA combined with Sidak's multiple comparison test (\*\*\*\* $p < 0.0001$ , \*\*\* $p < 0.001$ , \*\* $p < 0.01$ , \* $p < 0.05$ ).
